# Supplementary material
Source: PubMed Central journal article supplement (PMC3220296)
Supplement: supp_P019281_jlr.P019281-1.pdf [file supp_P019281_jlr.P019281-1.pdf]

**OSM Table 1 Change in plasma lipid concentrations after dietary interventions**

| Phenotype         | HS                |                    | LF                 |                    | <i>P</i> diet x gene |
|-------------------|-------------------|--------------------|--------------------|--------------------|----------------------|
|                   | Pro/Pro           | Pro/Ala + Ala/Ala  | Pro/Pro            | Pro/Ala + Ala/Ala  |                      |
|                   | ( <i>n</i> = 47 ) | ( <i>n</i> = 7 )   | ( <i>n</i> = 102 ) | ( <i>n</i> = 37 )  |                      |
| Total cholesterol | -0.04 (-0.2,0.1)  | -0.04 (-0.5,0.4)   | -0.4 (-0.5,-0.3)   | -0.5 (-0.7,-0.6)   | 0.72                 |
| Triglycerides     | 0.04 (-0.04,0.11) | -0.07 (-0.31,0.16) | -0.01 (-0.06,0.04) | -0.06 (-0.16,0.05) | 0.69                 |
| LDL cholesterol   | -0.03 (-0.2,0.10) | 0.1 (-0.3,0.5)     | -0.3 (-0.4,-0.2)   | -0.3 (-0.4,-0.1)   | 0.60                 |

| Phenotype         | HM                 |                   | LF                 |                    | <i>P</i> diet x gene |
|-------------------|--------------------|-------------------|--------------------|--------------------|----------------------|
|                   | Pro/Pro            | Pro/Ala + Ala/Ala | Pro/Pro            | Pro/Ala + Ala/Ala  |                      |
|                   | ( <i>n</i> = 109)  | ( <i>n</i> = 20 ) | ( <i>n</i> = 102 ) | ( <i>n</i> = 37)   |                      |
| Total cholesterol | -0.3 (-0.4,-0.2)   | -0.4 (-0.6,-0.1)  | -0.4 (-0.5,-0.3)   | -0.5 (-0.6,-0.3)   | 0.74                 |
| Triglycerides     | -0.01 (-0.06,0.04) | 0.00 (-0.14,0.14) | -0.01 (-0.06,0.04) | -0.06 (-0.15,0.04) | 0.43                 |
| LDL cholesterol   | -0.3 (-0.4,-0.2)   | -0.3 (-0.6,-0.1)  | -0.3 (-0.4,-0.2)   | -0.3 (-0.4,-0.1)   | 0.94                 |

Change in mean plasma total cholesterol and LDL-cholesterol and mean log triglyceride concentrations (95% CI) (mmol/L) after dietary interventions, stratified by *PPARG* Pro12Ala genotype are shown. *P*-values for pairwise comparisons adjusted for change in BMI, age and gender. HS High saturated fat diet, HM High MUFA diet, LF low fat diet.
